# Supplementary material
Source: PubMed Central journal article supplement (PMC2689330)
Supplement: tjp0587-1889-SD1.pdf [file tjp0587-1889-SD1.pdf]

| Publication                | Publication year | Species     | Subspecies                                                          | Brain region                                   | Cell type(s)                                                          | Age groups                             |
|----------------------------|------------------|-------------|---------------------------------------------------------------------|------------------------------------------------|-----------------------------------------------------------------------|----------------------------------------|
| Abbott et al.              | 1997             | Rat         | Long-Evans                                                          | Neocortex, visual cortex                       | L4 spiny neuron-to-L2/3 pyramidal cell                                | P17-adult                              |
| Ali and Nelson             | 2005             | Rat         | Sprague-Dawley                                                      | Neocortex, motor cortex                        | Pyramid-to-FS interneuron, Pyramid-to-BF interneuron                  | P17-P22                                |
| Angulo et al.              | 1999             | Rat         | Wistar                                                              | Neocortex, somatosensory cortex                | Pyramid-to-FS interneuron                                             | P21/P35                                |
| Bark et al.                | 2004             | Mice        | SNAP-25a and SNAP25b mutants                                        | Hippocampus                                    | CA1 pyramid                                                           | P21-P25                                |
| Bender and Feldman         | 2003             | Rat         |                                                                     | Neocortex, somatosensory cortex, Barrel cortex | L4 spiny neurons                                                      | P6-P7/P8-P11/P14-P26                   |
| Berton et al.              | 1997             | Rat         |                                                                     | Neocortex                                      | Layer 2/3 neurons<br>Layer 4 neurons<br>Layer 5 neurons               | P0/P4-P6/P13-P15/P20/Adult             |
| Blue and Parnavelas        | 1983a            | Rat         | Sprague-Dawley                                                      | Neocortex, visual cortex                       |                                                                       | P0/P2/P4/P6/P8/P10/P12/P14/P20/P28/P90 |
| Blue and Parnavelas        | 1983b            | Rat         | Sprague-Dawley                                                      | Neocortex, visual cortex                       |                                                                       | P0/P2/P4/P6/P8/P10/P12/P14/P20/P28/P90 |
| Lu et al.                  | 2006             | Mice        | C57BL/6<br><i>Barrelless (C57BL/6-Adcv1brl)</i>                     | Neocortex, somatosensory cortex, Barrel cortex | L4 spiny neurons, thalamocortical synapse (extracellular stimulation) | P4-P6/P7-P11                           |
| Brill and Huguenard        | 2008             | Rat         | Sprague-Dawley                                                      | Neocortex, somatosensory cortex                | L2/3 pyramidal cell, L5 pyramidal cell,                               | P6-P7/P8-P12/P13-P14/P16-P40           |
| Bureau et al.              | 2004             | Rat         | Sprague-Dawley                                                      | Neocortex, somatosensory cortex, Barrel cortex | L4 spiny neurons                                                      | P6-P16 (P8/P12/P16)                    |
| Carmignoto and Vicini      | 1992             | Rat         | Sprague-Dawley                                                      | Neocortex, occipital cortex                    | L4 spiny neurons                                                      | P12/P35; P25 after dark rearing        |
| Celio                      | 1990             | Rat         | Long—Evans (1)<br>Sprague—Dawley (4)<br>ZUR—Siv (20)<br>Wistar (66) | Brain, Spinal cord                             |                                                                       | Adult                                  |
| Choi and Lovinger          | 1997             | Rat         | Sprague-Dawley                                                      | Striatum                                       | Medium spiny neurons, corticostriatal stimulation (extracellular)     | P10-P26                                |
| Corlewet al.               | 2007             | Mice        | C57BL/6                                                             | Neocortex, visual cortex                       | L4 spiny neuron-to-L2/3 pyramidal cell                                | P7-P11/P13-P20/P23-P30/P72-P90         |
| De Felipe et al.           | 1997             | Mice        | C57BL/6                                                             | Neocortex, somatosensory cortex, Barrel cortex |                                                                       | P4/P6/P8/P11/P16/P32/Adult             |
| De Paola et al.            | 2006             | Mice        | C57BL/6<br><i>GFP—expressing</i>                                    | Neocortex                                      | Axons in Layer 1                                                      | > P90                                  |
| Dyson and Jones            | 1980             | Rat         |                                                                     | Neocortex, occipital cortex                    |                                                                       | P15/P20/P28/P75/P224                   |
| Felmy and Schneeggenburger | 2004             | Rat/<br>ice | M Wistar / C57BL/6                                                  | Brainstem                                      | Calyx of Held                                                         | P6/P14/P21/P31                         |

|                       |      |        |                           |                                                      |                                                                                                                  |                                                   |
|-----------------------|------|--------|---------------------------|------------------------------------------------------|------------------------------------------------------------------------------------------------------------------|---------------------------------------------------|
| Finnerty et al.       | 1999 | Rat    |                           | Neocortex,<br>somatosensory cortex,<br>Barrel cortex | L2/3 pyramidal cell, L4—L2/3 pathway<br>(extracellular stimulation)                                              | P21-P25 (after deprivation of 10 days!)           |
| Flint et al.          | 1997 | Rat    |                           | Neocortex,<br>somatosensory cortex                   | L2/3 pyramidal cell                                                                                              | P4-P5/P8-P9                                       |
| Fontanez and Porter   | 2006 | Mice   |                           | Neocortex,<br>somatosensory cortex,<br>Barrel cortex | L4 spiny neurons, L4 interneurons                                                                                | P13-P21                                           |
| Frick et al.          | 2007 | Rat    | Wistar                    | Neocortex,<br>somatosensory cortex                   | L5A pyramid-to-L5A pyramid                                                                                       | P14-P16/P17-P20/P24-P29                           |
| Gao et al.            | 2001 | Ferret |                           | Neocortex,<br>medial prefrontal cortex               | L5 pyramid-to-L5 pyramid                                                                                         | 1.5 - 2 month                                     |
| Gonchar               | 2007 | Mice   | C57BL/6                   | Neocortex,<br>visual cortex                          | Neocortical GABAergic interneurons                                                                               | P0/P5/P13/P16/P33/P150/P300                       |
| Hanganu               | 2002 | Rat    | Wistar                    | Neocortex,<br>somatosensory cortex                   | Subplate neurons                                                                                                 | P0-P3                                             |
| Hardingham et al.     | 2007 | Rat    | Sprague-Dawley            | Neocortex,<br>visual cortex                          | L2/3 pyramid-to-L2/3 pyramid                                                                                     | P19-P27                                           |
| Helmstaedter et al.   | 2008 | Rat    | Wistar                    | Neocortex,<br>somatosensory cortex,<br>Barrel cortex | L4 spiny neurons-to-L2/3 interneurons                                                                            | P20-P29                                           |
| Holtmaat et al.       | 2005 | Mice   | C57BL/6<br>GFP—expressing | Neocortex,<br>somatosensory cortex,<br>Barrel cortex | L5B pyramidal cells                                                                                              | adult: 2-5 month                                  |
| Hsia et al.           | 1998 | Rat    | Sprague-Dawley            | Hippocampus                                          | CA3-to-CA1 pyramid (extracellular<br>stimulation)                                                                | P4-P6/P8-P13/P16-P19/2-3 months/<br>up to 2 years |
| Iwasaki and Takahashi | 2001 | Rat    | Wistar                    | Brainstem                                            | Calyx of Held                                                                                                    | P7/P10/P14                                        |
| Jia et al.            | 2006 | Rat    | Wistar                    | Neocortex,                                           | LGN input (extracellular                                                                                         | P20/P30/>P60                                      |
| Katz and Miledi       | 1968 | Frog   |                           | Sartorius muscle                                     |                                                                                                                  |                                                   |
| Koester and Johnston  | 2005 | Rat    | Wistar                    | Neocortex,<br>somatosensory cortex                   | L2/3 pyramid-to-L2/3 pyramid, L2/3 pyramid-<br>to-bitufed interneuron L2/3 pyramid-to-<br>multipolar interneuron | P12-P16                                           |
| Kozloski et al.       | 2001 | Mice   | C57BL/6                   | Neocortex,<br>visual cortex                          | corticotectal L5 pyramid—to—L5 pyramid                                                                           | P14-P16                                           |
| Kumar and Huguenard   | 2001 | Rat    | Sprague-Dawley            | Neocortex,<br>granular frontal cortex                | corticotectal L5 pyramid—to—L5 interneuron<br>L5 pyramidal cell (callosal connections)                           | P13-P15/P16-P21                                   |
| Kumar et al.          | 2002 | Rat    | Sprague-Dawley            | Neocortex,<br>granular frontal cortex                | L5 pyramidal cell                                                                                                | P13-P15/P16-P21                                   |
| Levy et al.           | 2006 | Rat    | Wistar                    | Neocortex,<br>somatosensory cortex                   | L2/3 pyramid-to-L2/3 FS interneuron, L2/3<br>pyramid-to-L2/3 LTS interneuron                                     | P10-P26                                           |
| Levy et al.           | 2008 | Rat    | Wistar                    | Neocortex,<br>somatosensory cortex                   | L2/3 pyramid-to-L2/3 FS interneuron, L2/3<br>pyramid-to-L2/3 LTS interneuron                                     | P11-P26                                           |
| Markram and Tsodyks   | 1996 | Rat    | Wistar                    | Neocortex,<br>somatosensory cortex                   | L5 pyramid-to-L5 pyramid                                                                                         | P13-P15                                           |
| Markram et al.        | 1998 | Rat    | Wistar                    | Neocortex,                                           | L5 pyramid-to-L5 pyramid                                                                                         | P13-P15                                           |
| Micheva and Beaulieu  | 1996 | Rat    | Long-Evans                |                                                      |                                                                                                                  | P5/P10/P15/P20/P30/P60                            |
| Mori-Kawakami et al.  | 2003 | Mice   | CD-1 (ICR)                | Hippocampus                                          | Mossy fibre-CA3 pyramid                                                                                          | P21-P69 (3 weeks/9 weeks)                         |

|                                 |      |         |                            |                       |                                                |                                              |
|---------------------------------|------|---------|----------------------------|-----------------------|------------------------------------------------|----------------------------------------------|
| Mozhayeva et al.,               | 2002 | Rat/ice | M Sprague-Dawley           | Hippocampus (culture) | CA3 pyramid-DG                                 | P1-P2, then 5/6/7/10/20 days <i>in vitro</i> |
| Oswald and Reyes                | 2008 | Mice    | Swiss Webster              | Neocortex,            | L2/3 pyramidal cell                            | P10-P14/P15-P18/P19-P29                      |
| Pouzat and Hestrin              | 1997 | Rat     | Wistar                     | Cerebellum            | Basket/stellate interneuron-to-Purkinje cell   | P11-P15/P26-P31                              |
| Radnikow et al.                 | 2002 | Rat     | Wistar                     | Neocortex,            | Cajal-Retzius cell (Layer 1 input,             | P5-P11                                       |
| Radnikow et al.                 | 2009 | Rat     | Wistar                     | somatosensory cortex  | extracellular stimulation)                     |                                              |
| Ramoal and Sur                  | 1996 | Rat/    | Sprague-Dawley             | Neocortex,            | L4 spiny neuron-to-L4 spiny neuron             | P4-P6/P8-P10/P12-P15/P18-P28                 |
| Reyes and Sakmann               | 1999 | Ferret  | Wistar                     | somatosensory cortex  | 'cortical neurons'                             | P5-P47                                       |
| Reyes et al.                    | 1998 | Rat     | Wistar                     | Neocortex,            | visual cortex                                  | P30-P50                                      |
| Rozov and Burnashev             | 1999 | Rat     | Wistar                     | Neocortex,            | L5 pyramid-to-L5 pyramid                       | P14/P28                                      |
| Rozov et al.                    | 2001 | Rat     | Wistar                     | somatosensory cortex  | L5 pyramid-to-L5 pyramid                       | P13-P15                                      |
| Scanziani et al.                | 1998 | Rat     | Wistar                     | Neocortex,            | L2/3 pyramid-to-bitufed interneuron            | P14-P15                                      |
| Schulz et al.                   | 2004 | Rat     | Wistar                     | somatosensory cortex  | L2/3 pyramid-to-multipolar interneuron         |                                              |
| Seamans et al.                  | 2001 | Rat     | Sprague-Dawley             | Hippocampus           | CA3 pyramid-to-CA3 pyramid                     | P20-P30                                      |
| Sheng et al.                    | 1994 | Rat     | Long—Evans                 | Hippocampus (culture) | CA1 pyramid                                    | P7, then 7 days <i>in vitro</i>              |
| Shimohama et al.                | 1998 | Rat     | Wistar                     | Neocortex,            | L5 pyramidal cell (extracellular stimulation)  | P14-P20                                      |
| Shin et al.                     | 2005 | Rat     | Sprague-Dawley             | prefrontal cortex     |                                                | P1/P7/P10/P12/18/P21/P24/P27/P34/P53         |
| Sjöström et al.                 | 2007 | Rat     | Long-Evans                 | Neocortex             | L5 pyramidal cell                              | E19/P7/P14/P28/24 weeks/48 weeks/96 weeks    |
| Stocca and Vicini               | 1998 | Rat     | Sprague-Dawley             | Neocortex,            | L5 pyramid-to-L5 pyramid                       | P12-P14/P16-P20                              |
| Taschenberger and von Gersdorff | 2000 | Rat     | Sprague-Dawley             | visual cortex         | L5 pyramidal cell                              | P14-P21                                      |
| Thomson                         | 1997 | Rat     | Sprague-Dawley             | Brainstem             | Calyx of Held                                  | P3-P5/P7-P8/P13-P15                          |
| Trachtenberg et al.             | 2002 | Mice    | C57BL/6                    | Neocortex,            | L3 P-to-L3 pyramid                             | P5-P7/P12-P14                                |
| Tsodyks and Markram             | 1997 | Rat     | Wistar                     | somatosensory cortex, | L5 BF pyramid—to—L5 pyramid                    |                                              |
| Wasling et al.                  | 2004 | Rat     | Wistar                     | visual cortex,        | L5 RS pyramid—to—L5 pyramid                    |                                              |
| Xie et al.                      | 2007 | Rat     | Sprague-Dawley             | motor cortex          | L5B pyramidal cells                            | P34-P74                                      |
| Zhang                           | 2000 | Rat     | Sprague-Dawley             | Neocortex,            | L5 pyramid-to-L5 pyramid                       | P13-P15                                      |
| Zuo et al.                      | 2005 | Mice    | YFP—expressing L5 pyramids | somatosensory cortex, | CA3-to-CA1 pyramid (extracellular stimulation) | P3-P27                                       |
|                                 |      |         |                            | Barrel cortex         | L5 pyramidal cell                              | P0-P3, then 12-15 days <i>in vitro</i>       |
|                                 |      |         |                            |                       |                                                | P1-P36                                       |
|                                 |      |         |                            |                       |                                                | 1-6 month                                    |

E=embryonic day; P=postnatal day;  
age groups used are separated by '/'
